# Supplementary material
Source: PubMed Central journal article supplement (PMC2826257)

## SUPPLEMENTARY DATA

(A, B) Midday leaf water potential ( $\Psi_{\text{leaf}}$ ), (C, D) net leaf photosynthesis ( $A$ ), (E, F) stomatal conductance ( $g_{\text{ST}}$ ) and (G, H) instantaneous water use efficiency ( $A/g_{\text{ST}}$ ) of well-watered  $C_3$  and  $C_4$  Panicoid grasses. Data are presented for individual  $C_3$  and  $C_4$  species that were maintained with SWC above 16 % for a 75-d period. Values are means  $\pm$  s.e. and  $n > 5$  for each species.

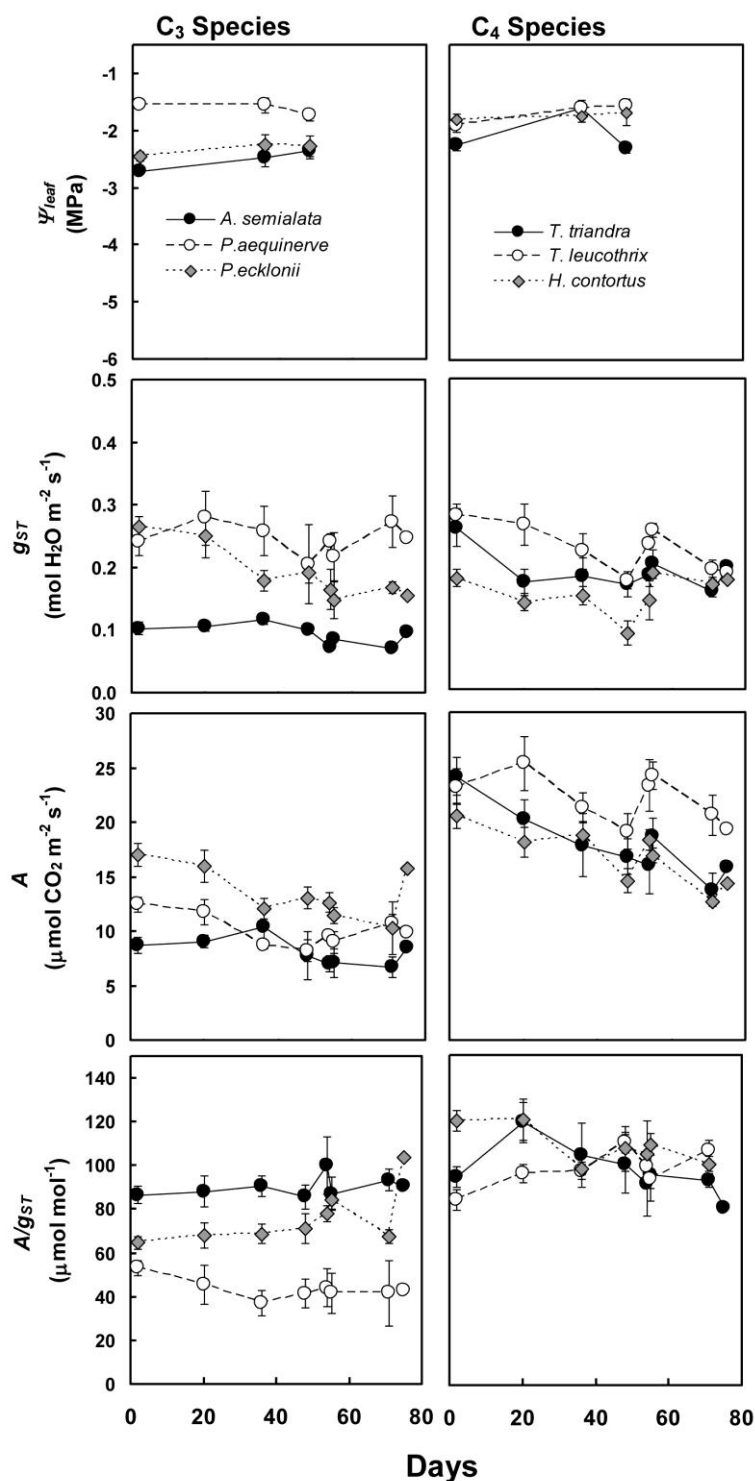

Supplement: mcp307_1.pdf [file mcp307_1.pdf]
